# Supplementary material for: Multifunctional magnetic calcium phosphate nanoparticles for targeted platin delivery
Source: Royal Society of Chemistry journal article supplement (doi:10.1039/c2dt30984j), 2012-01-01
Supplement: c2dt30984j.pdf [file c2dt30984j.pdf]

## Electronic Supplementary Information

### **Multifunctional magnetic calcium phosphate nanoparticles for targeted platinum delivery**

Smruti R. Rout,<sup>a</sup> Birendra Behera,<sup>b</sup> Tapas K. Maiti<sup>b</sup> and Sasmita Mohapatra\*<sup>a</sup>

<sup>a</sup>Department of Chemistry, National Institute of Technology, Rourkela, India-769008, E-mail: sasmitam@nitrkl.ac.in

<sup>b</sup>Department of Biotechnology, Indian Institute of Technology, Kharagpur, India-721302

**Figure S1**

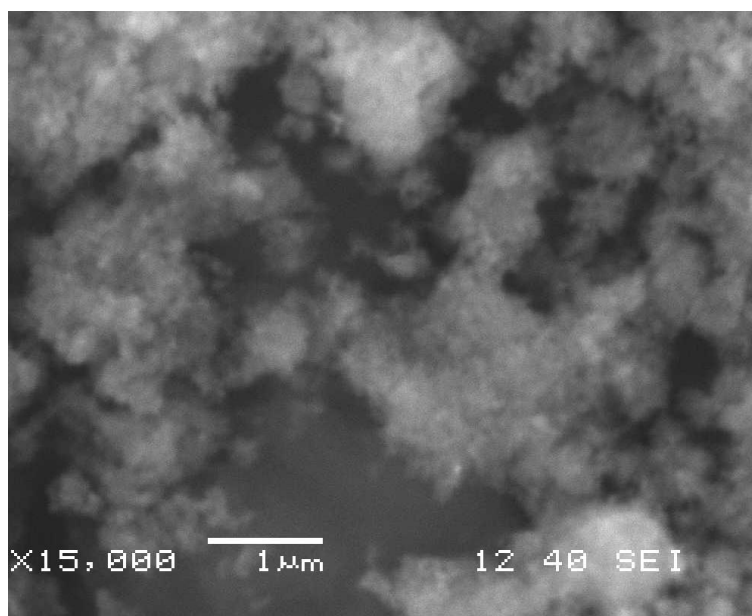

**Figure S1** SEM image of CoFe<sub>2</sub>O<sub>4</sub>@ACP-CDDP-FA-RITC nanoparticles

**Figure S2**

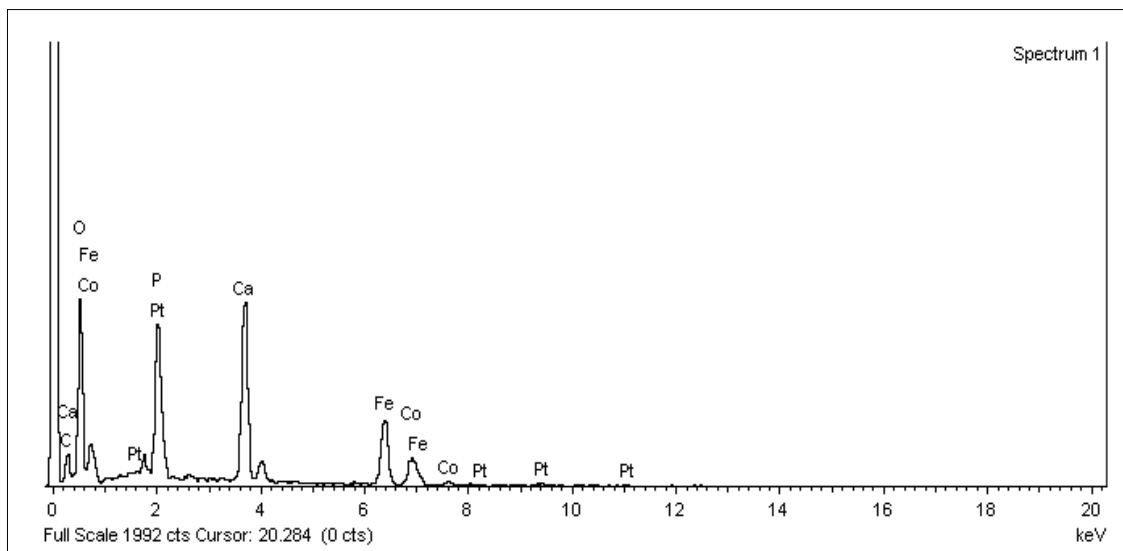

**Figure S2** EDX spectrum of  $\text{CoFe}_2\text{O}_4@ACP\text{-CDDP-FA-RITC}$  nanoparticles

**Figure S3**

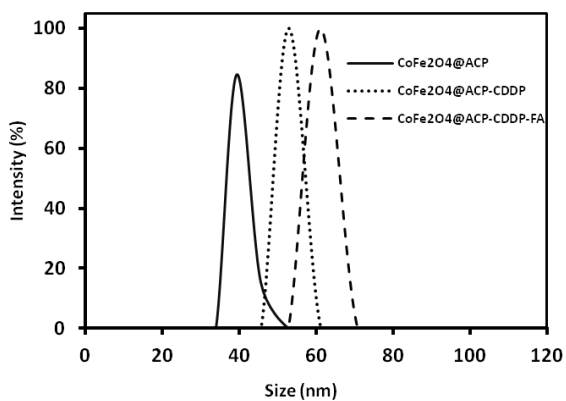

**Figure S3** Variation of hydrodynamic size after each step of modification

**Figure S4**

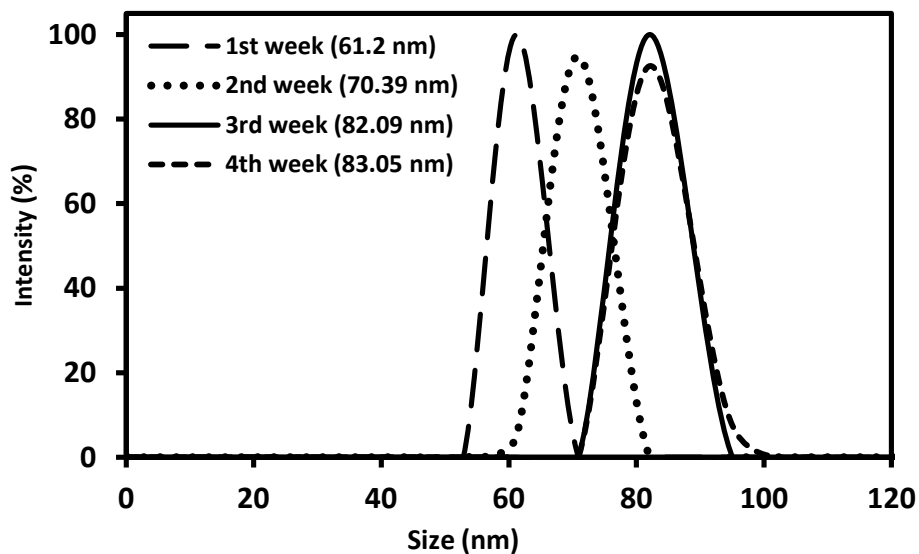

**Figure S4** Change in hydrodynamic size of CoFe<sub>2</sub>O<sub>4</sub>@ACP-CDDP-FA-RITC with respect to time

**Figure S5**

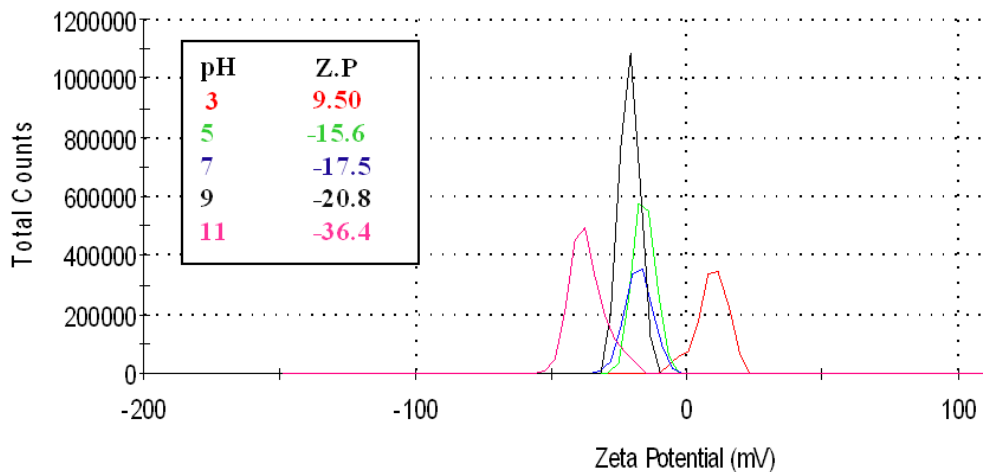

**Figure S5** Zeta potential variation of CoFe<sub>2</sub>O<sub>4</sub>@ACP-CDDP-FA with respect to pH

Figure S6

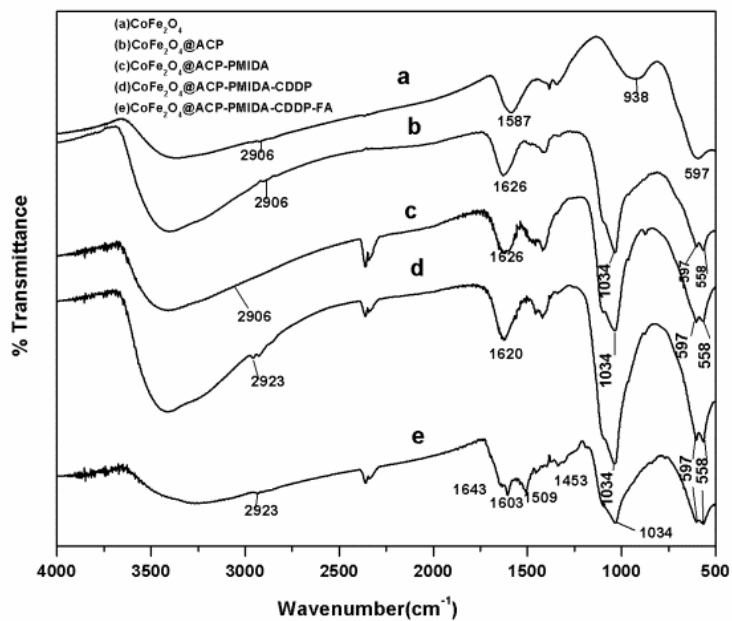

Figure S6 FTIR spectra after each step of conjugation

Figure S7

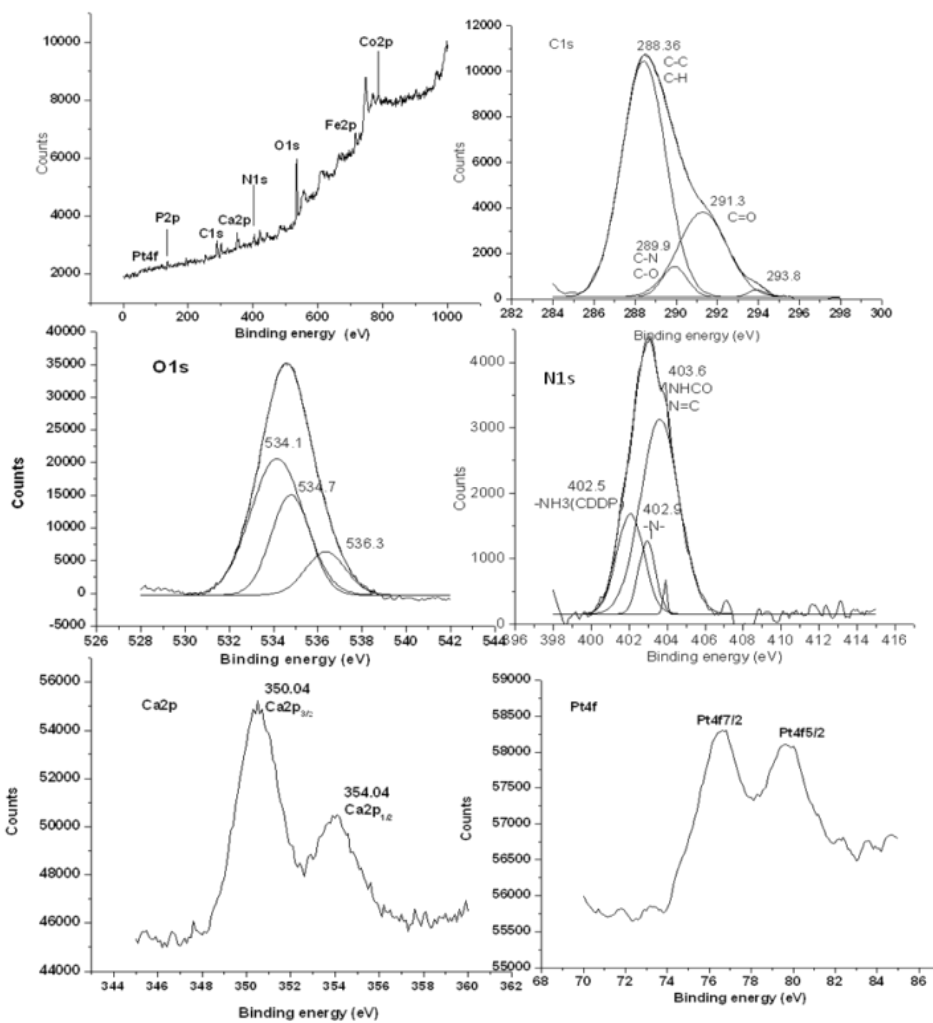

Figure S7 XPS survey spectrum of CoFe<sub>2</sub>O<sub>4</sub>@ACP-CDDP-FA. High resolution scans of (b) C1s, (c) O1s, (d) N1s, (e) Ca2p, (f) Pt4f

Figure S8

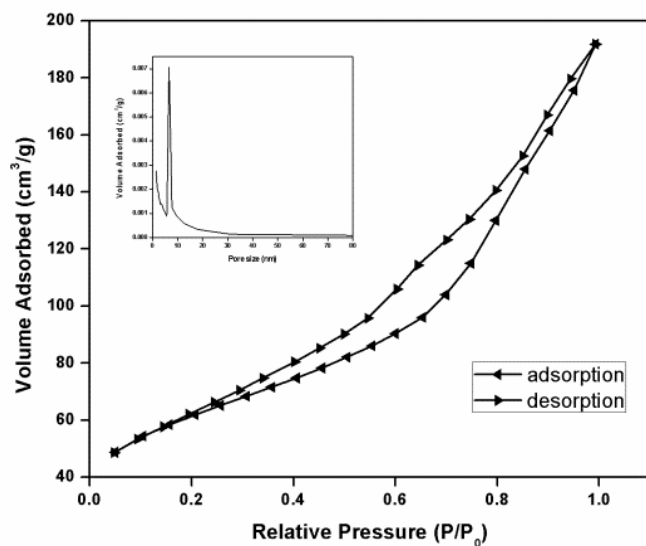

**Figure S8** Nitrogen adsorption-desorption isotherm and the corresponding pore size distribution (inset) of as synthesized CoFe<sub>2</sub>O<sub>4</sub> nanoparticles

Figure S9

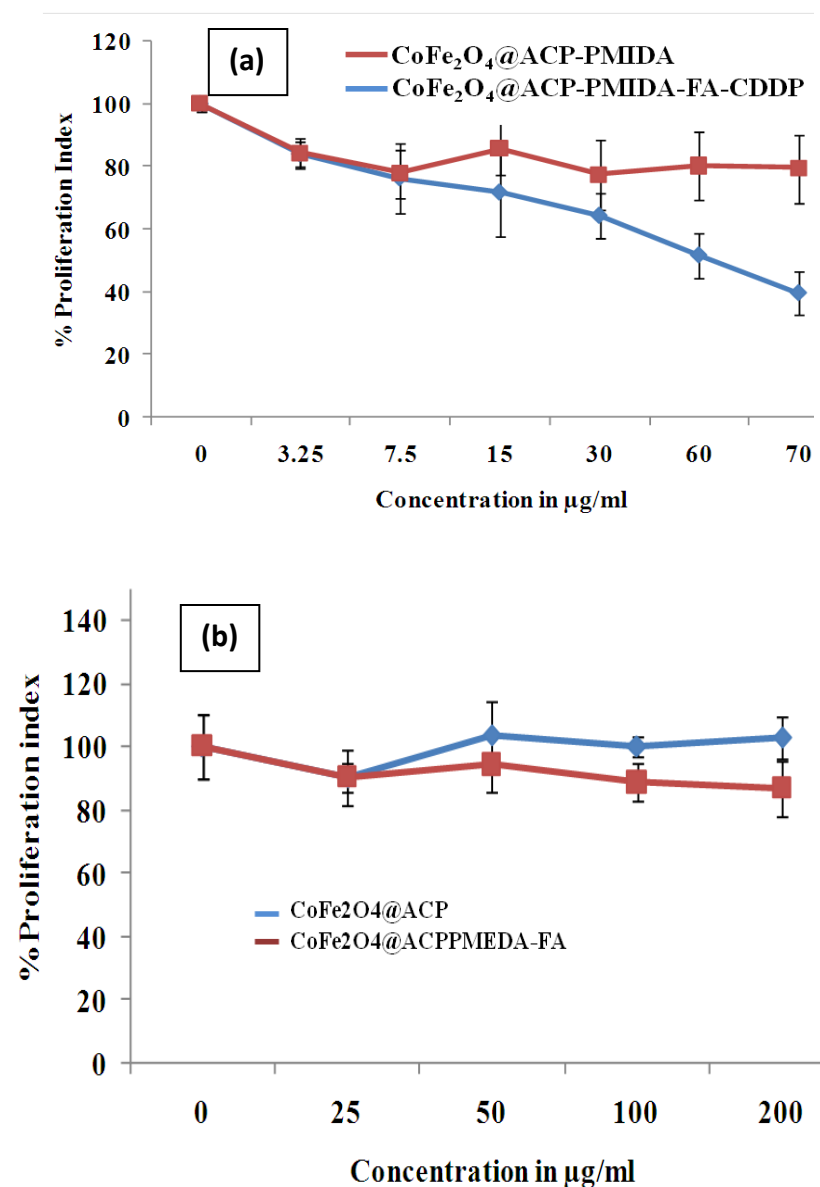

Figure S9 Cytotoxicity assay of nanoparticles on (a) HeLa and (b) L929 cells. Cells were treated with different concentrations of nanoparticles for 72 h and cell viability was measured by MTT assay

Figure S10

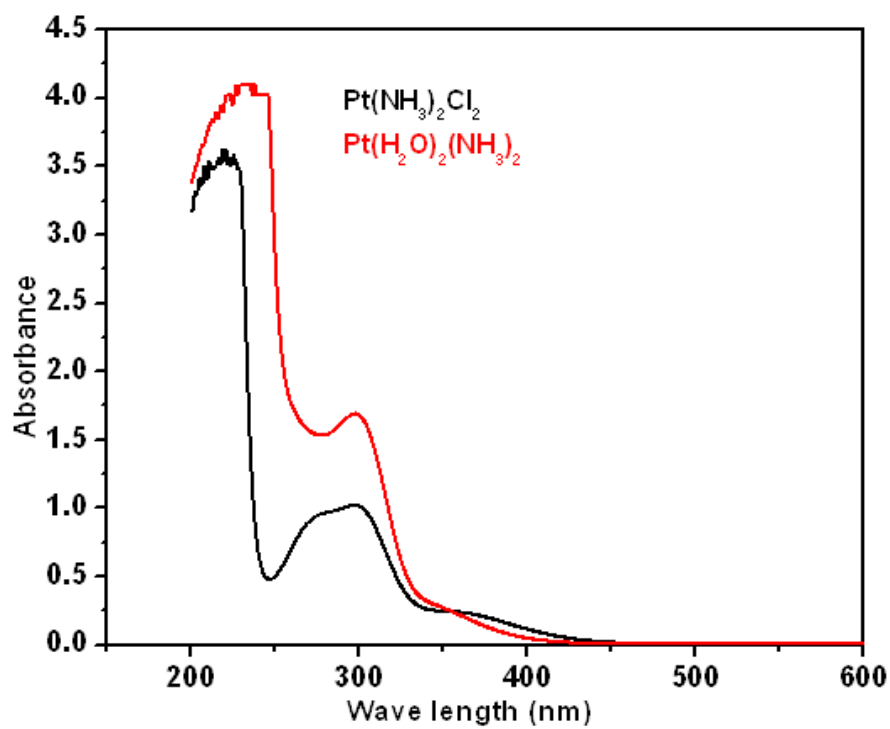

Figure S10 Change in UV-Visible spectrum of  $\text{Pt}(\text{NH}_3)_2\text{Cl}_2$  after reacting with 2 equivalents of  $\text{AgNO}_3$



**Figure S11**

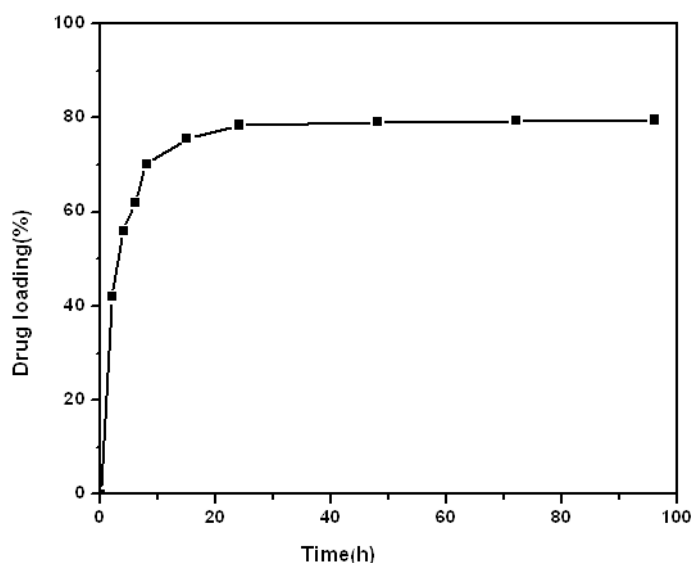

**Figure S11 CDDP loading (%) on -COOH functionalized CoFe<sub>2</sub>O<sub>4</sub> @ ACP nanoparticles**

### Calculation of drug loading capacity

The drug loading capacity was calculated as per our previously reported paper [1]. First, COOH functionalized particles were conjugated with Pt(H<sub>2</sub>O)<sub>2</sub>Cl<sub>2</sub> as described in the experimental section and then particles were separated from the aqueous suspension using magnetic separator (Invitrogen). The obtained drug-loaded CoFe<sub>2</sub>O<sub>4</sub>@ACP nanoparticles were incubated at 60 °C in vacuum overnight and were weighted. Drug concentration in supernatant was analyzed by the ultraviolet absorption ( $\lambda_{\text{max}} = 295 \text{ nm}$ ), with reference to a calibration curve on a UV-Vis spectrophotometer. The measurements were performed in triplicate. Drug-loading content and encapsulation efficiency were obtained by eqs 1 and 2, respectively [2].

$$\begin{aligned} \text{Drug-loading content (\%)} &= \frac{\text{Weight of the drug in nanoparticles}}{\text{weight of the nanoparticles}} \times 100 \\ &= \frac{0.013}{0.120} \times 100 = 10.8\% \end{aligned}$$

$$\begin{aligned} \text{Encapsulation efficiency (\%)} &= \frac{\text{Weight of the drug in nanoparticles}}{\text{Weight of the feeding drug}} \times 100 \\ &= \frac{0.013}{0.017} \times 100 = 76.4\% \end{aligned}$$
